# Supplementary material for: Insights into the spatial distribution of global, national, and subnational greenhouse gas emissions in the Emissions Database for Global Atmospheric Research (EDGAR v8.0)
Source: Copernicus journal article supplement (doi:10.5194/essd-16-2811-2024), 2024-06-14
Supplement: Supplementary file 1 [file essd-16-2811-2024-supplement.pdf]

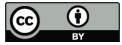

*Supplement of*

**Insights into the spatial distribution of global, national, and subnational greenhouse gas emissions in the Emissions Database for Global Atmospheric Research (EDGAR v8.0)**

**Monica Crippa et al.**

*Correspondence to:* Enrico Pisoni ([enrico.pisoni@ec.europa.eu](mailto:enrico.pisoni@ec.europa.eu))

The copyright of individual parts of the supplement might differ from the article licence.

**Table S1 - Overview of the spatial proxy data used for distributing the sector-specific country totals of EDGARv4.3.2 to 0.1deg0.1deg gridmaps (Janssens-Maenhout et al., 2019).**

| <b>EDGAR sector</b> | <b>Sector description</b>         | <b>Gridmaps</b>                                                                                                                                                                                                                                           | <b>Reference</b>                                                                                                                                                                                                                              |
|---------------------|-----------------------------------|-----------------------------------------------------------------------------------------------------------------------------------------------------------------------------------------------------------------------------------------------------------|-----------------------------------------------------------------------------------------------------------------------------------------------------------------------------------------------------------------------------------------------|
| <b>AGS</b>          | <b>Agricultural soils</b>         | Animals: buffalo, cattle, chicken, duck, goat, pig, poultry, sheep                                                                                                                                                                                        | livestock: <a href="http://livestock.geo-wiki.org/">http://livestock.geo-wiki.org/</a><br>buffaloes:<br><a href="http://www.fao.org/AG/AGInfo/resources/en/glw/GLW_dens.html">http://www.fao.org/AG/AGInfo/resources/en/glw/GLW_dens.html</a> |
|                     |                                   | Crops: barley, beans, broad bean, cassava, chick peas, cow peas, pasture, lentils, maize, millet, oats, other cereals, other pulses, other roots tubers, peas, potatoes, rice, rye, sorghum, soy bean, sugar beet, sugarcane, sweet potatoes, wheat, yams | Ramankutty, N., A.T. Evan, C. Monfreda, and J.A. Foley (2008), Farming the planet: 1. Geographic distribution of global agricultural lands in the year 2000. Global Biogeochemical Cycles 22, GB1003, doi:10.1029/2007GB002952.               |
|                     |                                   | Histosols                                                                                                                                                                                                                                                 | FAO Geonetwork, 2007                                                                                                                                                                                                                          |
|                     |                                   | Grassland                                                                                                                                                                                                                                                 | Global Land Cover map JRC (2000)                                                                                                                                                                                                              |
| <b>AWB</b>          | <b>Agricultural waste burning</b> | Crops: barley, beans, broad bean, cassava, chick peas, cow peas, pasture, lentils, maize, millet, oats, other cereals, other pulses, other roots tubers, peas, potatoes, rice, rye, sorghum, soy bean, sugar beet, sugarcane, sweet potatoes, wheat, yams | Ramankutty, N., A.T. Evan, C. Monfreda, and J.A. Foley (2008), Farming the planet: 1. Geographic distribution of global agricultural lands in the year 2000. Global Biogeochemical Cycles 22, GB1003, doi:10.1029/2007GB002952.               |
|                     |                                   | Grassland                                                                                                                                                                                                                                                 | Global Land Cover map JRC (2000)                                                                                                                                                                                                              |
| <b>CHE</b>          | <b>Production of chemicals</b>    | adipic acid, ammonia, caprolactam, glyoxal, nitric acid, sulfuric acid                                                                                                                                                                                    | In-house EDGAR proxy                                                                                                                                                                                                                          |

|            |                                              |                                                  |                                                                                                                                                                                                                                                                                                            |
|------------|----------------------------------------------|--------------------------------------------------|------------------------------------------------------------------------------------------------------------------------------------------------------------------------------------------------------------------------------------------------------------------------------------------------------------|
|            |                                              | Urban population                                 | In-house EDGAR proxy based on <a href="http://sedac.ciesin.columbia.edu/">http://sedac.ciesin.columbia.edu/</a>                                                                                                                                                                                            |
| <b>ENE</b> | <b>Power industry</b>                        | Power plants: auto-producers, coal, gas, oil     | CARMA v3 ( <a href="http://carma.org/">http://carma.org/</a> ) and local data for China                                                                                                                                                                                                                    |
| <b>ENF</b> | <b>Enteric fermentation</b>                  | Animals: buffaloes, cattles, goats, pigs, sheeps | livestock: <a href="http://livestock.geo-wiki.org/">http://livestock.geo-wiki.org/</a><br>buffaloes:<br><a href="http://www.fao.org/AG/AGInfo/resources/en/glw/GLW_dens.html">http://www.fao.org/AG/AGInfo/resources/en/glw/GLW_dens.html</a>                                                              |
|            |                                              | Grassland                                        | Global Land Cover map JRC (2000)                                                                                                                                                                                                                                                                           |
| <b>FOO</b> | <b>Production of foods</b>                   | Urban population                                 | In-house EDGAR proxy based on <a href="http://sedac.ciesin.columbia.edu/">http://sedac.ciesin.columbia.edu/</a>                                                                                                                                                                                            |
| <b>FFF</b> | <b>Fossil Fuel Fires</b>                     | coal fires                                       | In-house EDGAR proxy                                                                                                                                                                                                                                                                                       |
|            |                                              | gas flaring                                      | In-house EDGAR proxy based on <a href="https://www.ngdc.noaa.gov/eog/viirs.html">https://www.ngdc.noaa.gov/eog/viirs.html</a>                                                                                                                                                                              |
| <b>IND</b> | <b>Combustion for manufacturing industry</b> | cement                                           | In-house EDGAR proxy based on USGS ( <a href="http://mrdata.usgs.gov/mineral-operations/">http://mrdata.usgs.gov/mineral-operations/</a> ) and EPRTR ( <a href="http://prtr.ec.europa.eu">http://prtr.ec.europa.eu</a> ) and CEC ( <a href="http://takingstock.cec.org/">http://takingstock.cec.org/</a> ) |
|            |                                              | chemical                                         | In-house EDGAR proxy                                                                                                                                                                                                                                                                                       |
|            |                                              | mining                                           | In-house EDGAR proxy based on USGS ( <a href="https://mrdata.usgs.gov/mrds/">https://mrdata.usgs.gov/mrds/</a> )                                                                                                                                                                                           |
|            |                                              | paper                                            | In-house EDGAR proxy based on EPRTR ( <a href="http://prtr.ec.europa.eu">http://prtr.ec.europa.eu</a> ) and CEC ( <a href="http://takingstock.cec.org/">http://takingstock.cec.org/</a> )                                                                                                                  |
|            |                                              | steel                                            | In-house EDGAR proxy                                                                                                                                                                                                                                                                                       |

|            |                                      |                                                                                                        |                                                                                                                                                                                                                                            |
|------------|--------------------------------------|--------------------------------------------------------------------------------------------------------|--------------------------------------------------------------------------------------------------------------------------------------------------------------------------------------------------------------------------------------------|
|            |                                      | Urban population                                                                                       | In-house EDGAR proxy based on <a href="http://sedac.ciesin.columbia.edu/">http://sedac.ciesin.columbia.edu/</a>                                                                                                                            |
| <b>IRO</b> | <b>Iron and steel production</b>     | Blast furnace, Basic oxygen furnace, Open hearth furnace, Crude steel, Electric furnace, Sinter, Steel | In-house EDGAR proxy                                                                                                                                                                                                                       |
| <b>MNM</b> | <b>Manure management</b>             | Animals: buffalo, cattle, chicken, duck, goat, pig, sheep                                              | livestock: <a href="http://livestock.geo-wiki.org/">http://livestock.geo-wiki.org/</a><br>buffaloes: <a href="http://www.fao.org/AG/AGInfo/resources/en/glw/GLW_dens.html">http://www.fao.org/AG/AGInfo/resources/en/glw/GLW_dens.html</a> |
|            |                                      | Grassland                                                                                              | Global Land Cover map JRC (2000)                                                                                                                                                                                                           |
| <b>NEU</b> | <b>Non energy use of fuels</b>       | Urban population                                                                                       | In-house EDGAR proxy based on <a href="http://sedac.ciesin.columbia.edu/">http://sedac.ciesin.columbia.edu/</a>                                                                                                                            |
| <b>NFE</b> | <b>Non-ferrous metals production</b> | Aluminum production (primary and secondary)                                                            | In-house EDGAR proxy                                                                                                                                                                                                                       |
|            |                                      | Copper production (primary and secondary)                                                              | In-house EDGAR proxy based on USGS ( <a href="https://mrdata.usgs.gov/mrds/">https://mrdata.usgs.gov/mrds/</a> )                                                                                                                           |
|            |                                      | Magnesium production (primary and secondary)                                                           | In-house EDGAR proxy                                                                                                                                                                                                                       |
|            |                                      | Lead production (primary and secondary)                                                                | In-house EDGAR proxy                                                                                                                                                                                                                       |
|            |                                      | Zinc production (primary and secondary)                                                                | In-house EDGAR proxy based on USGS ( <a href="https://mrdata.usgs.gov/mrds/">https://mrdata.usgs.gov/mrds/</a> )                                                                                                                           |
|            |                                      | Urban population                                                                                       | In-house EDGAR proxy based on <a href="http://sedac.ciesin.columbia.edu/">http://sedac.ciesin.columbia.edu/</a>                                                                                                                            |

|            |                                         |                                  |                                                                                                                                                                                                                                                                                                            |
|------------|-----------------------------------------|----------------------------------|------------------------------------------------------------------------------------------------------------------------------------------------------------------------------------------------------------------------------------------------------------------------------------------------------------|
| <b>NMM</b> | <b>Non-metallic minerals production</b> | cement                           | In-house EDGAR proxy based on USGS ( <a href="http://mrdata.usgs.gov/mineral-operations/">http://mrdata.usgs.gov/mineral-operations/</a> ) and EPRTR ( <a href="http://prtr.ec.europa.eu">http://prtr.ec.europa.eu</a> ) and CEC ( <a href="http://takingstock.cec.org/">http://takingstock.cec.org/</a> ) |
|            |                                         | lime                             | In-house EDGAR proxy based on USGS ( <a href="http://mrdata.usgs.gov/mineral-operations/">http://mrdata.usgs.gov/mineral-operations/</a> ) and EPRTR ( <a href="http://prtr.ec.europa.eu">http://prtr.ec.europa.eu</a> ) and CEC ( <a href="http://takingstock.cec.org/">http://takingstock.cec.org/</a> ) |
|            |                                         | Urban population                 | In-house EDGAR proxy based on <a href="http://sedac.ciesin.columbia.edu/">http://sedac.ciesin.columbia.edu/</a>                                                                                                                                                                                            |
| <b>PAP</b> | <b>Production of pulp and paper</b>     | paper                            | In-house EDGAR proxy based on EPRTR ( <a href="http://prtr.ec.europa.eu">http://prtr.ec.europa.eu</a> ) and CEC ( <a href="http://takingstock.cec.org/">http://takingstock.cec.org/</a> )                                                                                                                  |
| <b>PRO</b> | <b>Fuel exploitation</b>                | Coal mining: brown and hard coal | In-house EDGAR proxy based on EPRTR ( <a href="http://prtr.ec.europa.eu">http://prtr.ec.europa.eu</a> ) and USGS ( <a href="https://www.usgs.gov/">https://www.usgs.gov/</a> ) and Global Energy Observatory ( <a href="http://globalenergyobservatory.org/">http://globalenergyobservatory.org/</a> )     |
|            |                                         | gas flaring                      | In-house EDGAR proxy based on <a href="https://www.ngdc.noaa.gov/eog/viirs.html">https://www.ngdc.noaa.gov/eog/viirs.html</a>                                                                                                                                                                              |
|            |                                         | Gas pipelines transmission       | In-house EDGAR proxy                                                                                                                                                                                                                                                                                       |
|            |                                         | oil pipelines                    | In-house EDGAR proxy                                                                                                                                                                                                                                                                                       |
|            |                                         | oil terminals                    | In-house EDGAR proxy based on World Port Index (PUB 150) ( <a href="http://msi.nga.mil/MSISiteContent/StaticFiles/NAV_PUBS/WPI/Pub150bk.pdf">http://msi.nga.mil/MSISiteContent/StaticFiles/NAV_PUBS/WPI/Pub150bk.pdf</a> )                                                                                 |
|            |                                         | shipping tankers                 | In-house EDGAR proxy based on LRIT and Wang et al.                                                                                                                                                                                                                                                         |

|                |                                                   |                                           |                                                                                                                                                                                                                                                                                                                                                                                                               |
|----------------|---------------------------------------------------|-------------------------------------------|---------------------------------------------------------------------------------------------------------------------------------------------------------------------------------------------------------------------------------------------------------------------------------------------------------------------------------------------------------------------------------------------------------------|
|                |                                                   |                                           | (2007)                                                                                                                                                                                                                                                                                                                                                                                                        |
|                |                                                   | population                                | In-house EDGAR proxy based on <a href="http://sedac.ciesin.columbia.edu/">http://sedac.ciesin.columbia.edu/</a>                                                                                                                                                                                                                                                                                               |
|                |                                                   | Roads: commercial heavy duty, residential | In-house EDGAR proxy based on OpenStreetMap                                                                                                                                                                                                                                                                                                                                                                   |
| <b>PRU</b>     | <b>Production and use of other products</b>       | Urban population                          | In-house EDGAR proxy based on <a href="http://sedac.ciesin.columbia.edu/">http://sedac.ciesin.columbia.edu/</a>                                                                                                                                                                                                                                                                                               |
| <b>RCO</b>     | <b>Energy for buildings</b>                       | fishing                                   | In-house EDGAR proxy based on KNB (Benjamin Halpern, Melanie Frazier, John Potapenko, Kenneth Casey, Kellee Koenig, et al. 2015. Cumulative human impacts: raw stressor data (2008 and 2013). KNB Data Repository. doi:10.5063/F1S180FS.) <a href="https://knb.ecoinformatics.org/#view/raw_2013_inorganic_mol_20150714095441">https://knb.ecoinformatics.org/#view/raw_2013_inorganic_mol_20150714095441</a> |
|                |                                                   | Rural population, urban population        | In-house EDGAR proxy based on <a href="http://sedac.ciesin.columbia.edu/">http://sedac.ciesin.columbia.edu/</a>                                                                                                                                                                                                                                                                                               |
| <b>REF_TRF</b> | <b>Oil refineries and Transformation industry</b> | coke                                      | In-house EDGAR proxy                                                                                                                                                                                                                                                                                                                                                                                          |
|                |                                                   | gas flaring                               | In-house EDGAR proxy based on <a href="https://www.ngdc.noaa.gov/eog/viirs.html">https://www.ngdc.noaa.gov/eog/viirs.html</a>                                                                                                                                                                                                                                                                                 |
|                |                                                   | Iron Blast furnace                        | In-house EDGAR proxy                                                                                                                                                                                                                                                                                                                                                                                          |
|                |                                                   | mining                                    | In-house EDGAR proxy based on USGS ( <a href="https://mrdata.usgs.gov/mrds/">https://mrdata.usgs.gov/mrds/</a> )                                                                                                                                                                                                                                                                                              |
|                |                                                   | oil refineries                            | In-house EDGAR proxy                                                                                                                                                                                                                                                                                                                                                                                          |

|                         |                                                    |                                                                                        |                                                                                                                                                                                                                               |
|-------------------------|----------------------------------------------------|----------------------------------------------------------------------------------------|-------------------------------------------------------------------------------------------------------------------------------------------------------------------------------------------------------------------------------|
|                         |                                                    | oil terminals                                                                          | In-house EDGAR proxy based on World Port Index (PUB 150)<br>( <a href="http://msi.nga.mil/MSISiteContent/StaticFiles/NAV_PUBS/WPI/Pub150bk.pdf">http://msi.nga.mil/MSISiteContent/StaticFiles/NAV_PUBS/WPI/Pub150bk.pdf</a> ) |
|                         |                                                    | Residential Roads                                                                      | In-house EDGAR proxy based on OpenStreetMap                                                                                                                                                                                   |
|                         |                                                    | Urban population                                                                       | In-house EDGAR proxy based on<br><a href="http://sedac.ciesin.columbia.edu/">http://sedac.ciesin.columbia.edu/</a>                                                                                                            |
| <b>SOL</b>              | <b>Application of solvents</b>                     | Urban population, rural population                                                     | In-house EDGAR proxy based on<br><a href="http://sedac.ciesin.columbia.edu/">http://sedac.ciesin.columbia.edu/</a>                                                                                                            |
| <b>SWD_INC</b>          | <b>Solid waste incineration</b>                    | Solid waste incineration                                                               | In-house EDGAR proxy based on EPRTR<br>( <a href="http://prtr.ec.europa.eu">http://prtr.ec.europa.eu</a> )                                                                                                                    |
| <b>SWD_LDF</b>          | <b>Solid waste landfills</b>                       | Solid waste landfills                                                                  | In-house EDGAR proxy based on EPRTR<br>( <a href="http://prtr.ec.europa.eu">http://prtr.ec.europa.eu</a> ) and CEC<br>( <a href="http://takingstock.cec.org/">http://takingstock.cec.org/</a> )                               |
| <b>TNR_Aviation_CDS</b> | <b>Aviation climbing&amp;descent</b>               | domestic aviation climb-out/descending,<br>international aviation climb-out/descending | In-house EDGAR proxy based on Airline Route Mapper<br>( <a href="http://arm.64hosts.com/">http://arm.64hosts.com/</a> )                                                                                                       |
| <b>TNR_Aviation_CRS</b> | <b>Aviation cruise</b>                             | domestic aviation cruise, international aviation<br>cruise                             | In-house EDGAR proxy based on Airline Route Mapper<br>( <a href="http://arm.64hosts.com/">http://arm.64hosts.com/</a> )                                                                                                       |
| <b>TNR_Aviation_LTO</b> | <b>Aviation landing&amp;takeoff</b>                | domestic aviation takeoff landing, international<br>aviation takeoff landing           | In-house EDGAR proxy based on Airline Route Mapper<br>( <a href="http://arm.64hosts.com/">http://arm.64hosts.com/</a> )                                                                                                       |
| <b>TNR_Aviation_SPS</b> | <b>Aviation supersonic</b>                         | supersonic aviation                                                                    | In-house EDGAR proxy                                                                                                                                                                                                          |
| <b>TNR_Other</b>        | <b>Railways, pipelines,<br/>off-road transport</b> | Residential Roads                                                                      | In-house EDGAR proxy based on OpenStreetMap                                                                                                                                                                                   |
|                         |                                                    | railways                                                                               | In-house EDGAR proxy                                                                                                                                                                                                          |

|                 |                             |                                                     |                                                                                                                                                                                           |
|-----------------|-----------------------------|-----------------------------------------------------|-------------------------------------------------------------------------------------------------------------------------------------------------------------------------------------------|
| <b>TNR_Ship</b> | <b>Shipping</b>             | Shipping: cargo, passengers, tankers                | In-house EDGAR proxy based on LRIT (Alessandrini et al., 2017) and Wang et al. (2008)                                                                                                     |
|                 |                             | inland waterways                                    | In-house EDGAR proxy                                                                                                                                                                      |
| <b>TRO</b>      | <b>Road transportation</b>  | Roads: commercial heavy and light duty, residential | In-house EDGAR proxy based on OpenStreetMap                                                                                                                                               |
| <b>WWT</b>      | <b>Waste water handling</b> | Waste water treatment                               | In-house EDGAR proxy based on EPRTR ( <a href="http://prtr.ec.europa.eu">http://prtr.ec.europa.eu</a> ) and CEC ( <a href="http://takingstock.cec.org/">http://takingstock.cec.org/</a> ) |
|                 |                             | Urban population, rural population                  | In-house EDGAR proxy based on <a href="http://sedac.ciesin.columbia.edu/">http://sedac.ciesin.columbia.edu/</a>                                                                           |



## S2 Comparison of power plant point sources

Figure S1 shows the location of all power plants in EDGARv7.0 and EDGARv8.0 by fossil fuel type.

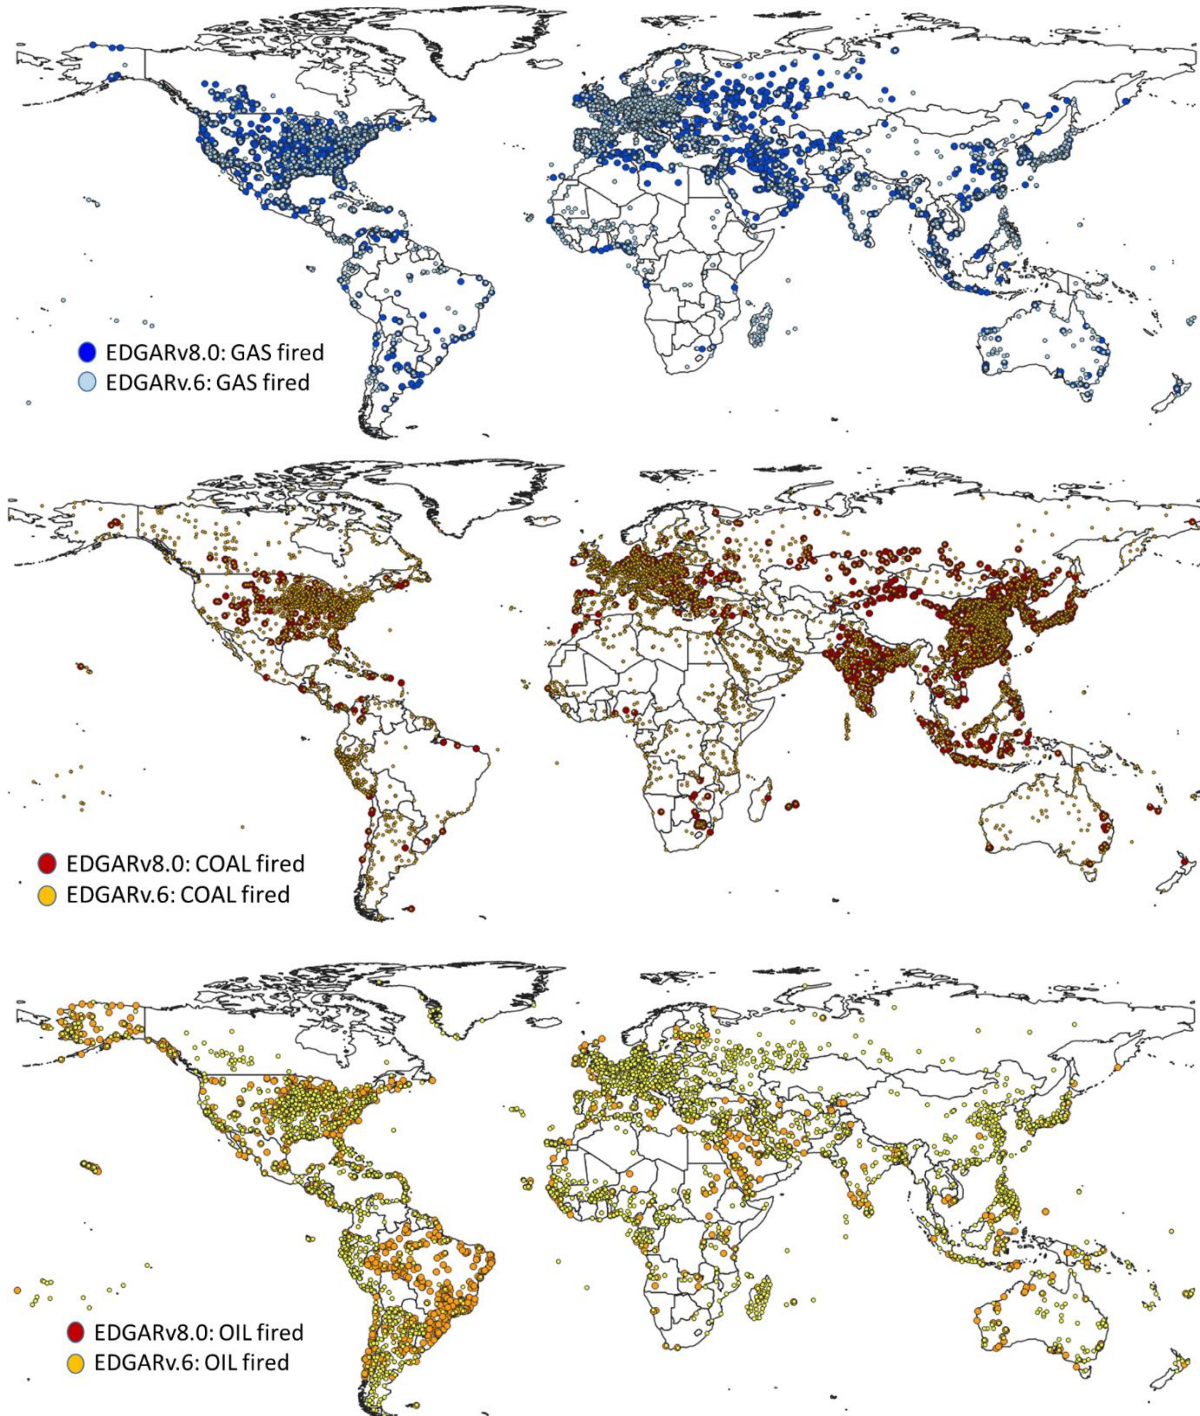

Figure S1 – Global coverage of fossil fuel fired power plants in EDGARv8.0 compared to EDGARv7.0.

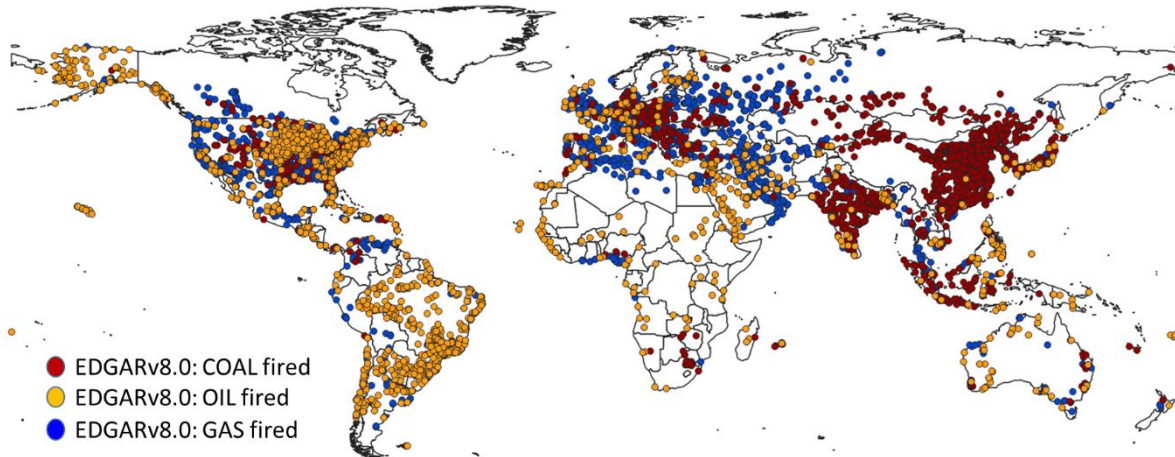

**Figure S2 – Global coverage of power plants by fuel type in EDGARv8.0.**

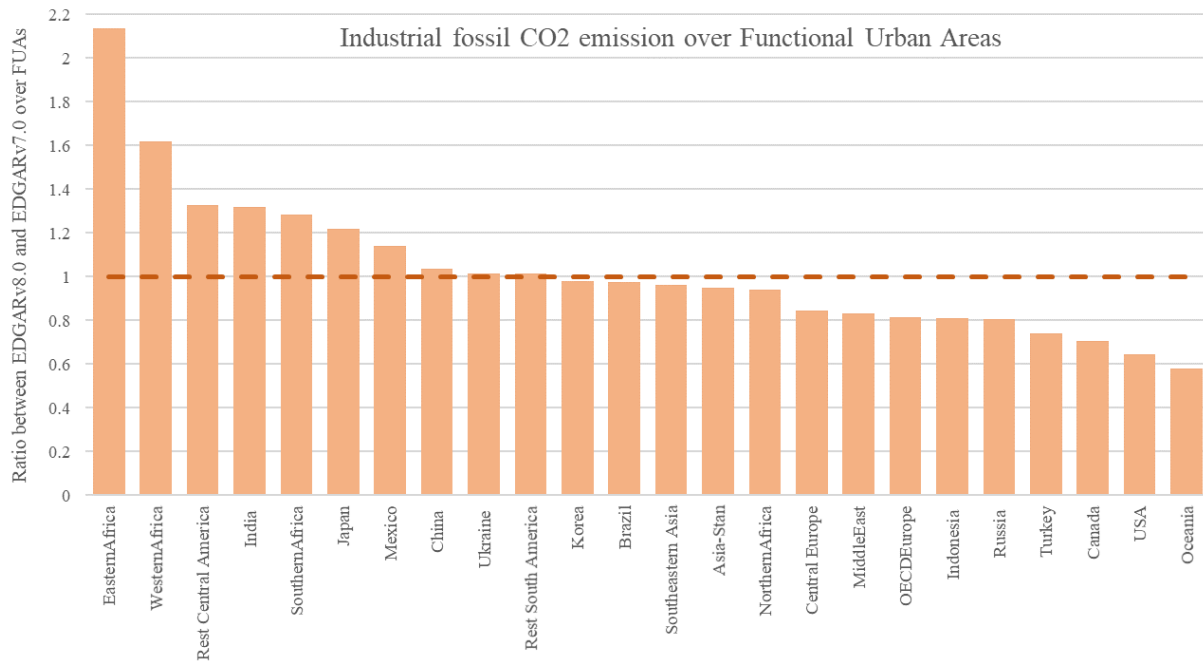

**Figure S3 – Ratio between EDGARv8.0 and EDGARv7.0 of industrial fossil CO<sub>2</sub> emissions in 2022 happening over global Functional Urban Areas (FUAs).**

International shipping CO<sub>2</sub> emissions (2022) – EDGARv8 spatial proxies

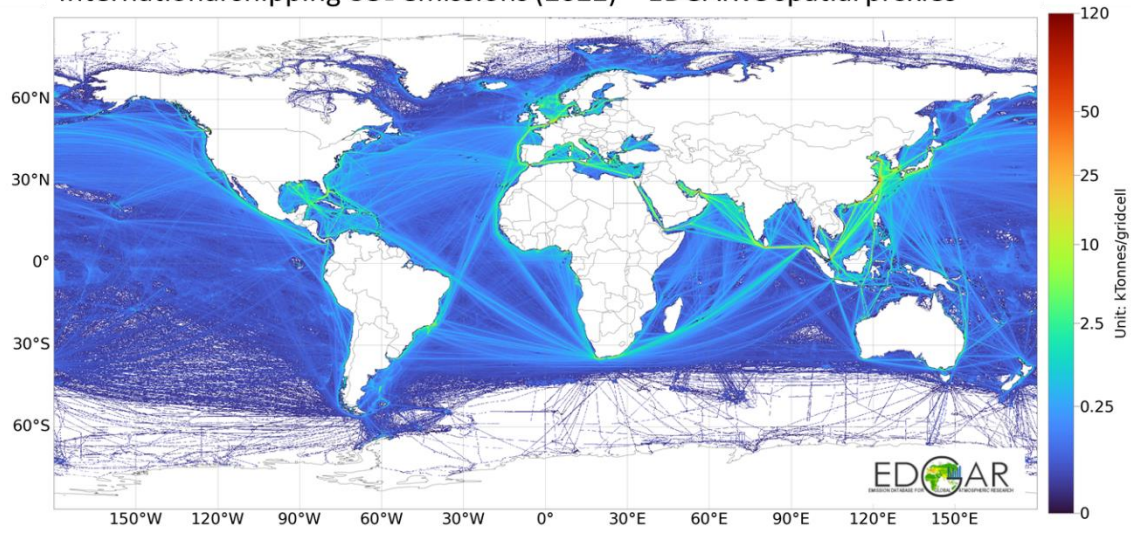

International shipping CO<sub>2</sub> emissions (2022) – EDGARv5 spatial proxies

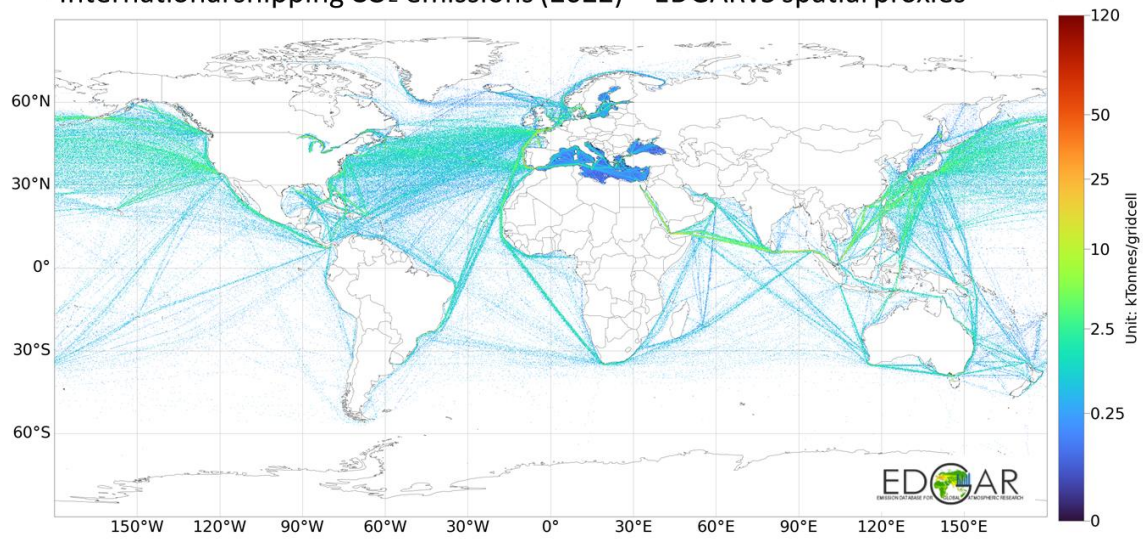

**Figure S4 – International shipping CO<sub>2</sub> emission maps (2022) using EDGARv5 and EDGARv8 spatial proxies.**



GWP\_100\_AR5\_GHG emissions:  
TOTALS (Year 1970)

Global total:24.50Gt  
EDGARv8.0

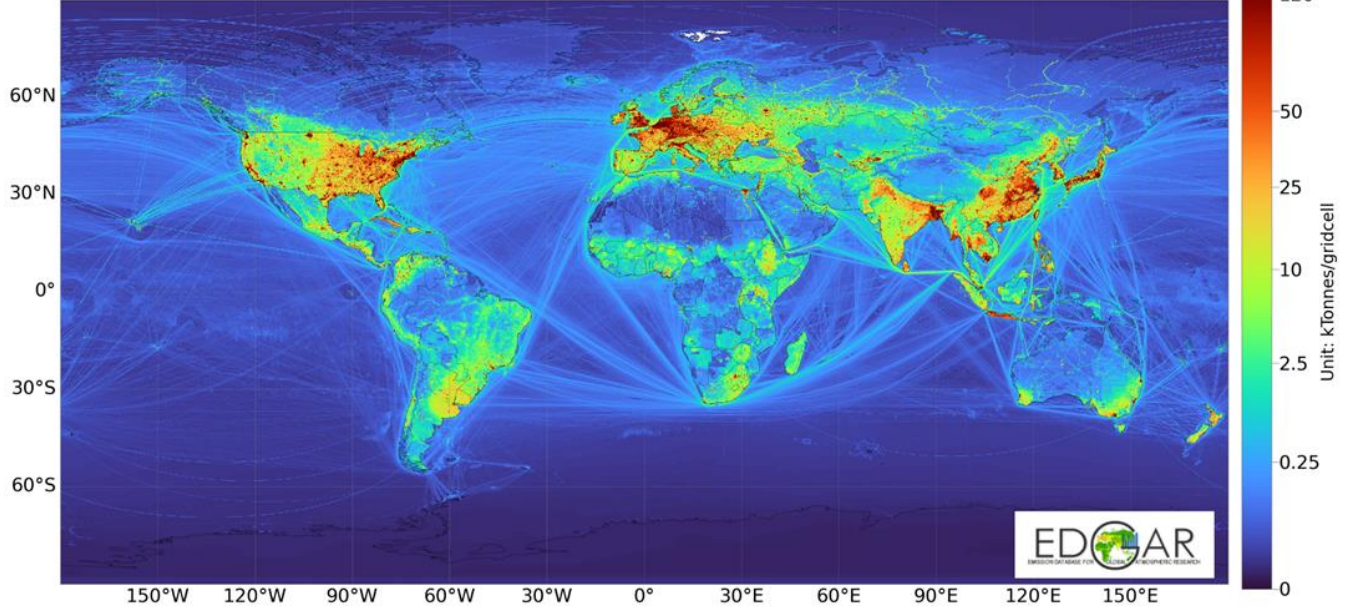

GWP\_100\_AR5\_GHG emissions:  
TOTALS (Year 2022)

Global total:53.79Gt  
EDGARv8.0

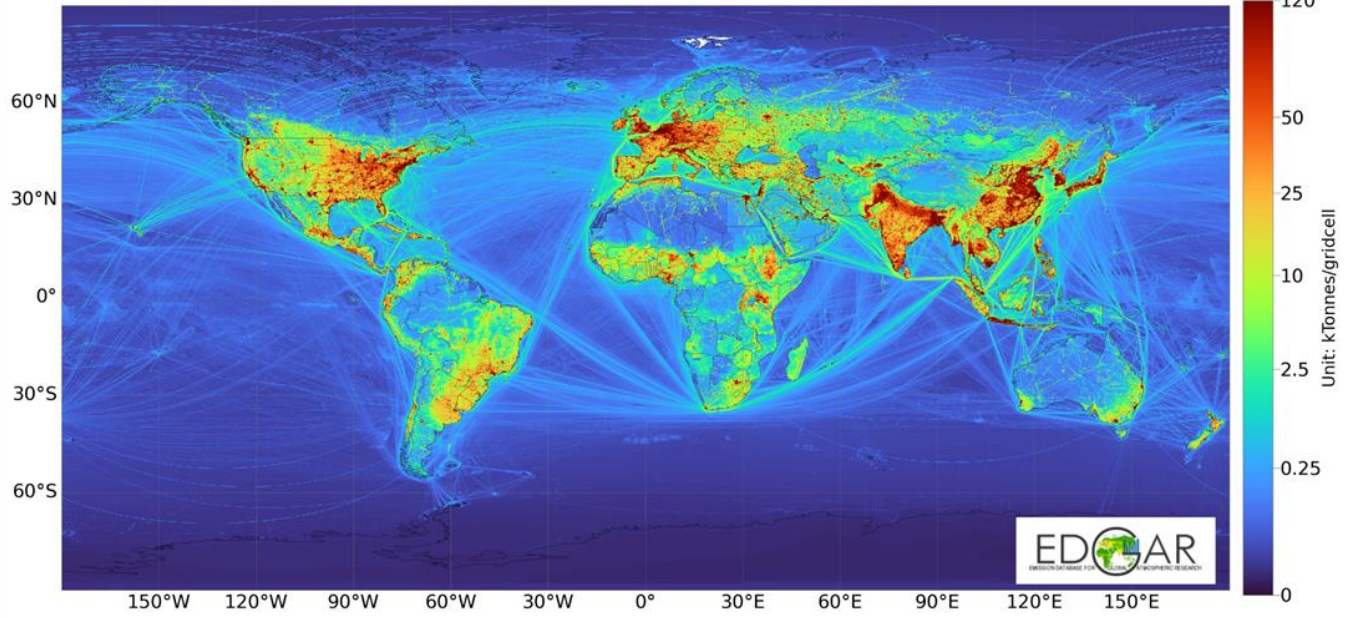

Figure S5 – Evolution of global GHG emission maps from 1970 to 2022.



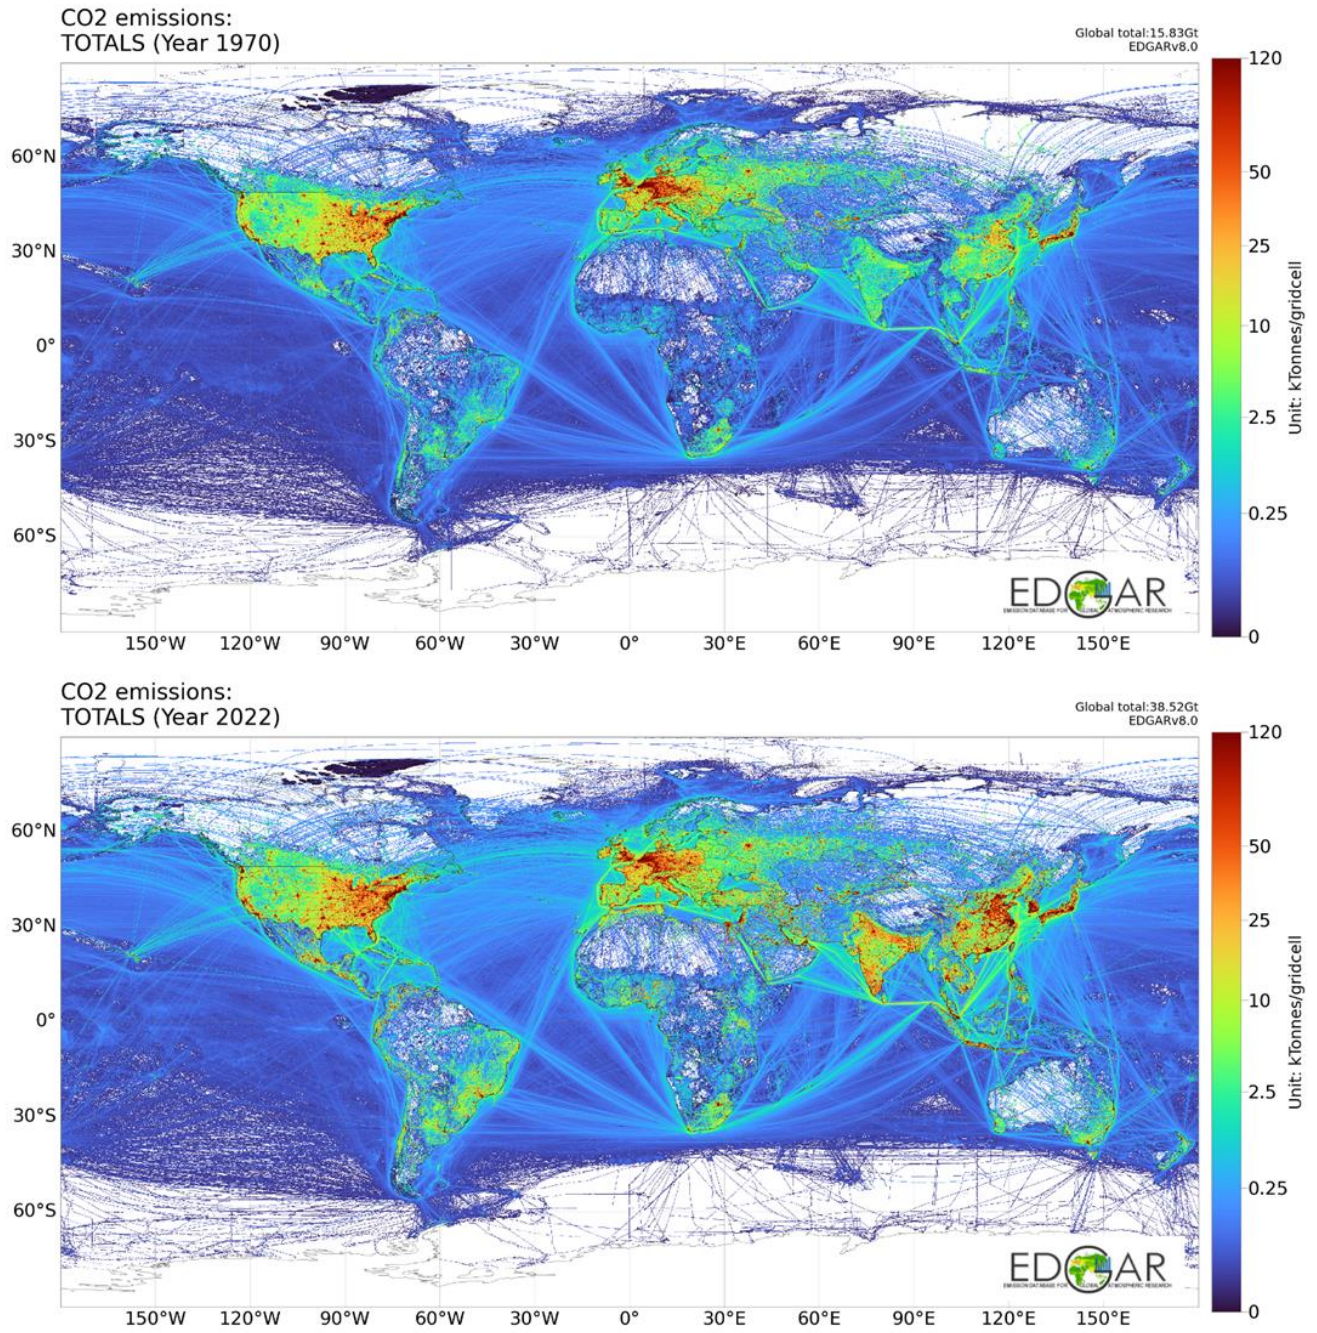

Figure S6 – Evolution of global fossil CO2 emission maps from 1970 to 2022.



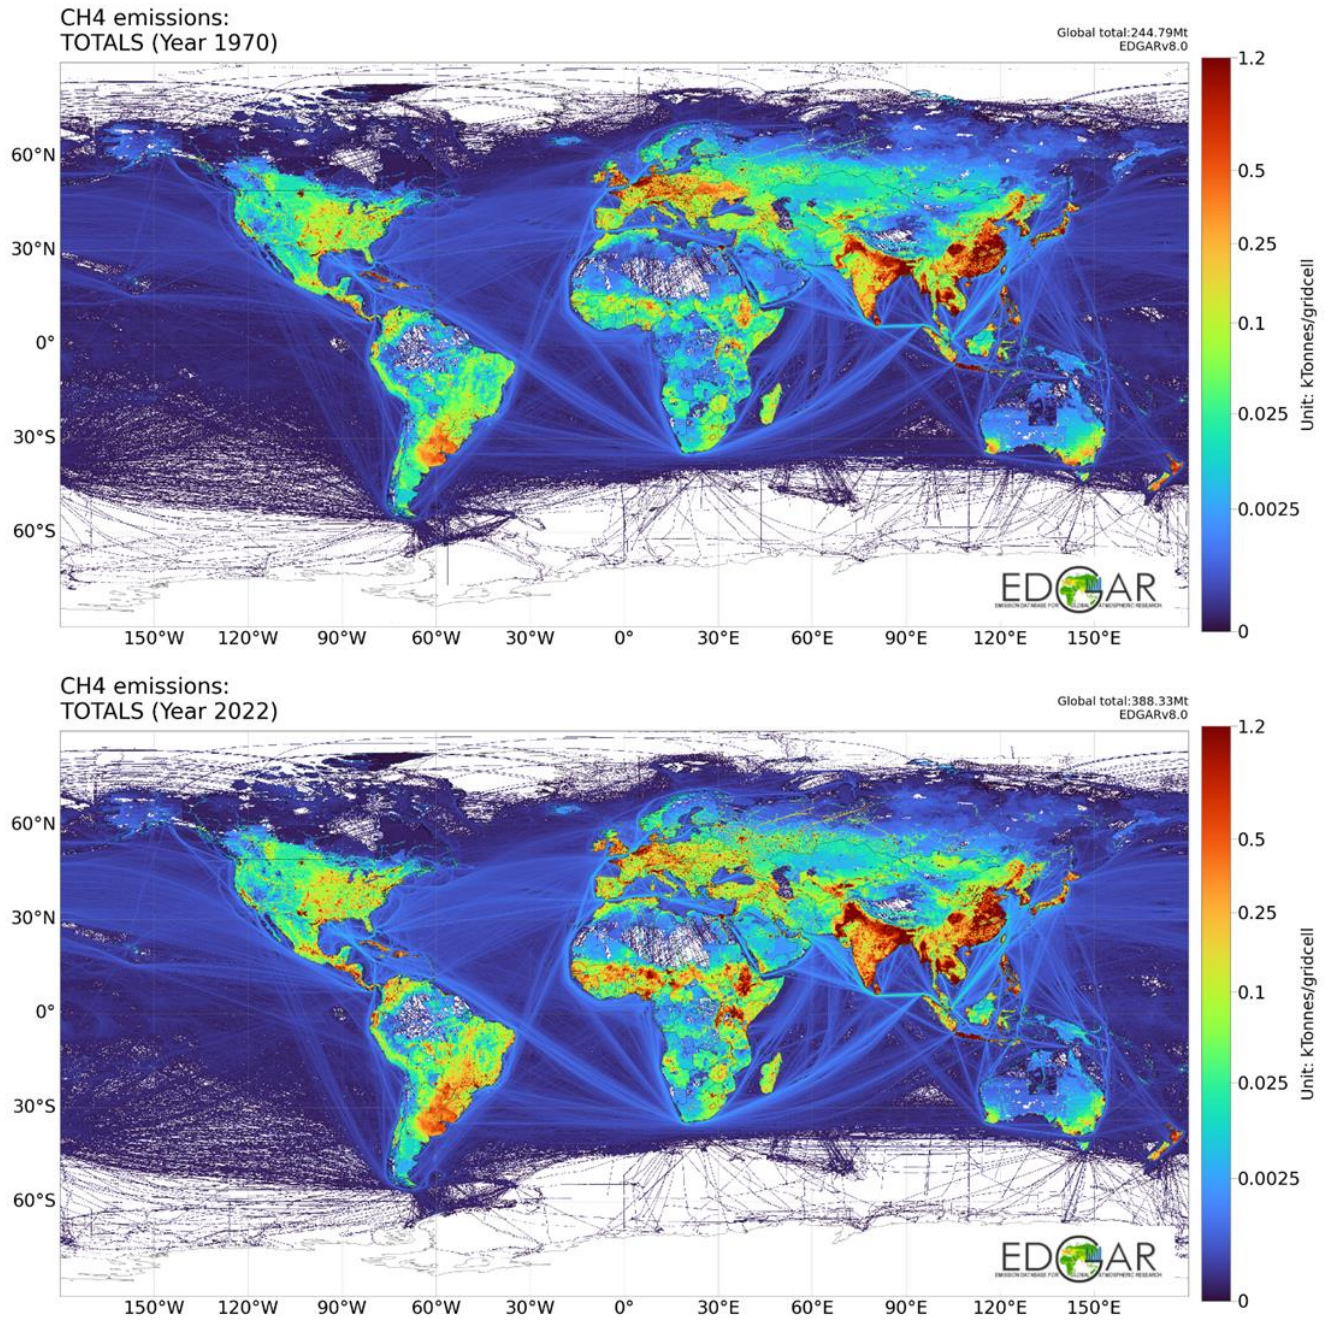

Figure S7 – Evolution of global CH4 emission maps from 1970 to 2022.

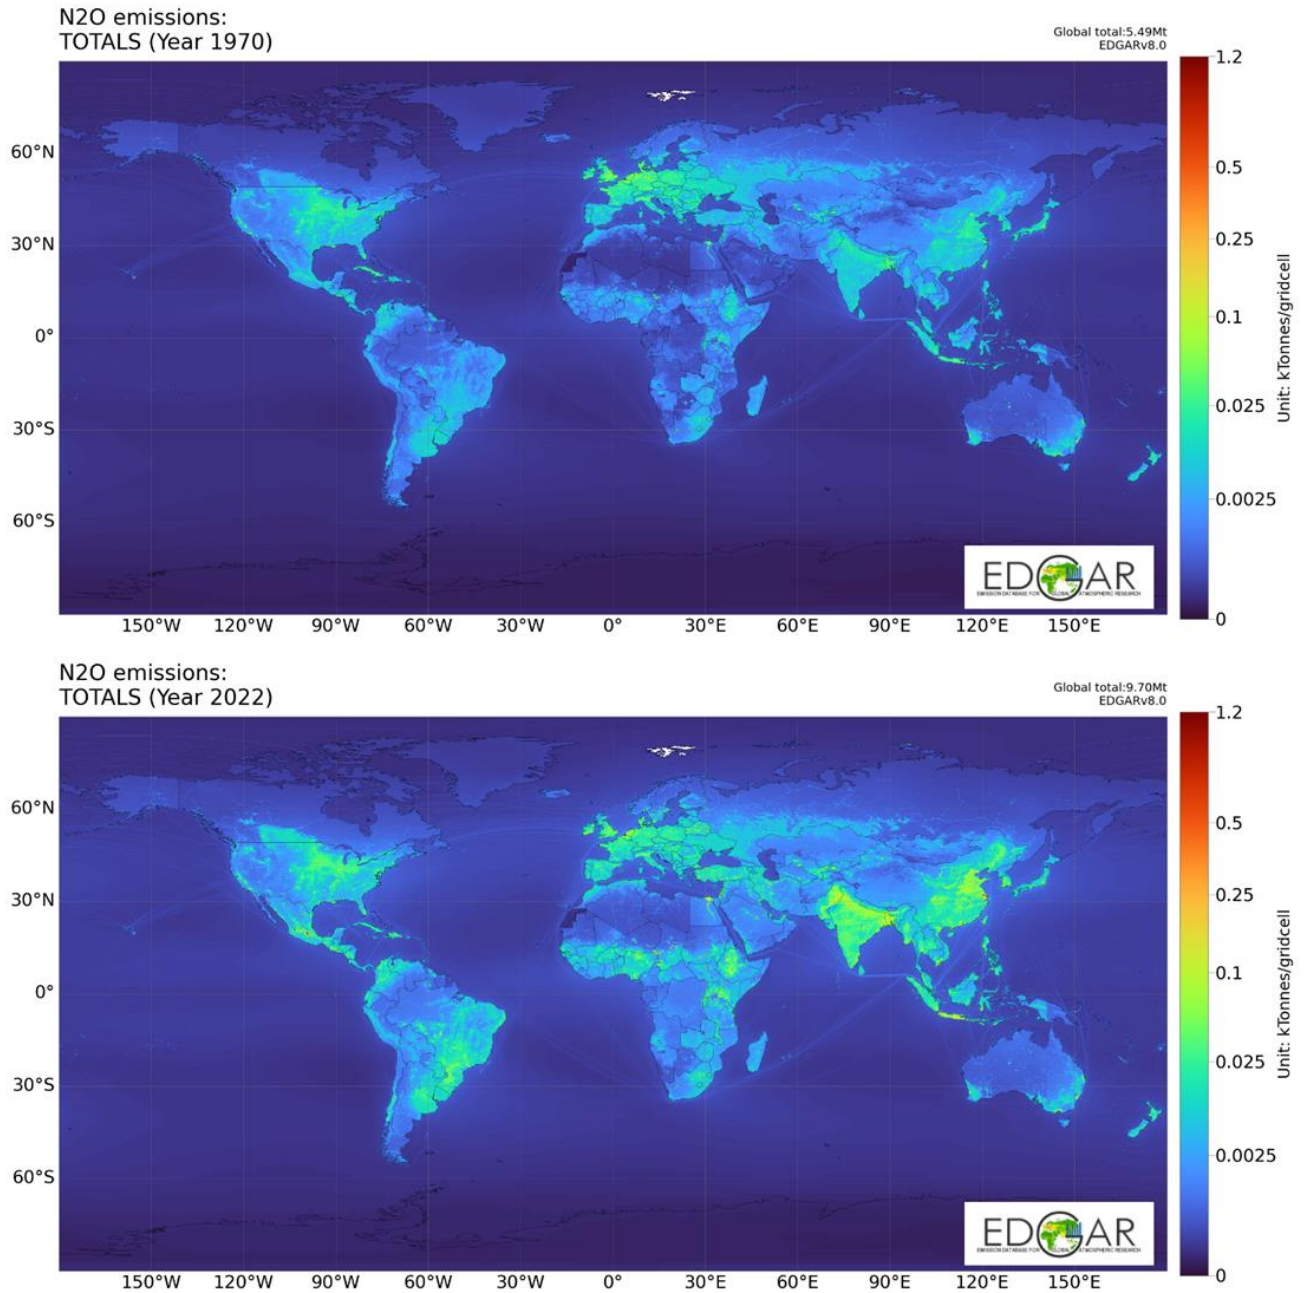

**Figure S8 – Evolution of global N<sub>2</sub>O emission maps from 1970 to 2022.**

## References

Janssens-Maenhout, G., Crippa, M., Guizzardi, D., Muntean, M., Schaaf, E., Dentener, F., Bergamaschi, P., Pagliari, V., Olivier, J. G. J., Peters, J. A. H. W., van Aardenne, J. A., Monni, S., Doering, U., Petrescu, A. M. R., Solazzo, E., and Oreggioni, G. D.: EDGAR v4.3.2 Global Atlas of the three major greenhouse gas emissions for the period 1970–2012, *Earth Syst. Sci. Data*, 11, 959-1002, 10.5194/essd-11-959-2019, 2019.
